# Supplementary material for: Coordination-driven self-assembly: construction of a Fe3O4–graphene hybrid 3D framework and its long cycle lifetime for lithium-ion batteries
Source: Royal Society of Chemistry journal article supplement (doi:10.1039/c5ra04837k), 2015-01-01
Supplement: c5ra04837k1.pdf [file c5ra04837k1.pdf]

## Supporting Information for

The Coordination-driven of Self-assembly: Construction of  $\text{Fe}_3\text{O}_4/\text{Gr}$  Hybrid

3D Framework and Its Long Cycle Lifetime for Lithium-ion Batteries

Zhimin Ren, Siqi Yu, Xinxin Fu, Lin Shi, Chunxiao Sun, Chenyao Fan, Qi Liu,  
Guodong Qian and Zhiyu Wang\*

State Key Laboratory of Silicon Materials, Department of Materials Science and  
Engineering, Zhejiang University, Hangzhou 310027, China.

Corresponding Author Zhiyu Wang: Tel/Fax: +86-571-87952267; E-mail:  
wangzhiyu@zju.edu.cn.

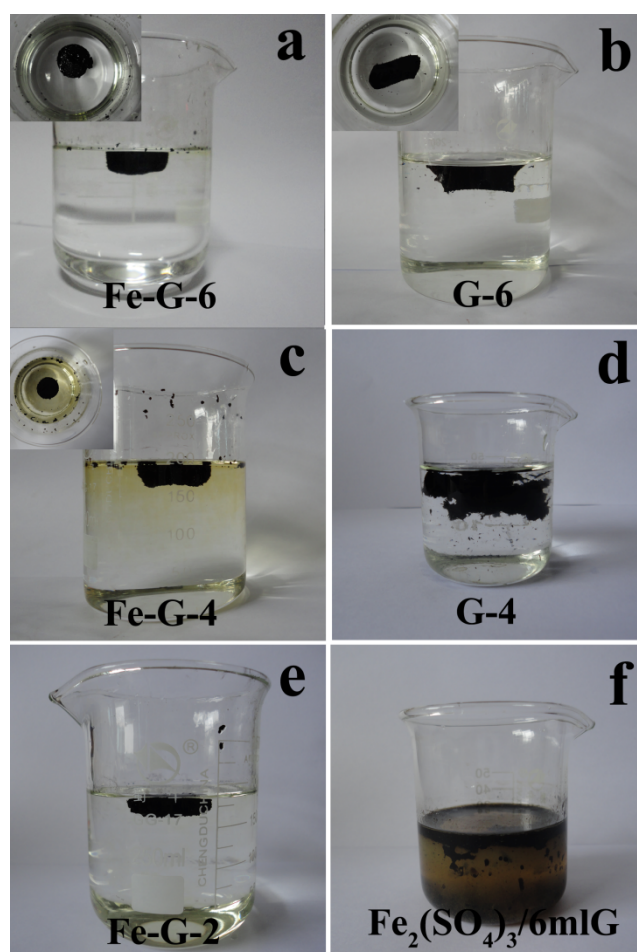

**Fig. S1.** Digital photographs of  $\text{Fe}_3\text{O}_4/\text{Graphene}$  hybrid framework (a, c and e) and pure graphene (b and d) by hydrothermal with different volume of GO solution. a, b)

$V_{GO}=6$  mL; c, d)  $V_{GO}=4$  mL; e)  $V_{GO}=2$  mL; f) Photographs of the product under the same condition with (a) except the different  $Fe^{3+}$  source, indicating the existence of synergistic effect of self-assembly between  $Fe_3O_4$  and graphene

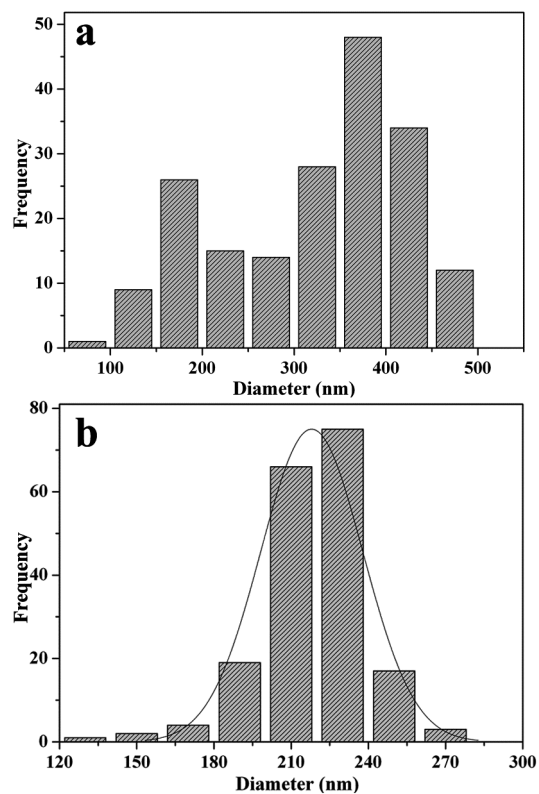

**Fig. S2.** Size distribution of a) bare  $Fe_3O_4$ ; b)  $Fe_3O_4/G$  hybrid framework

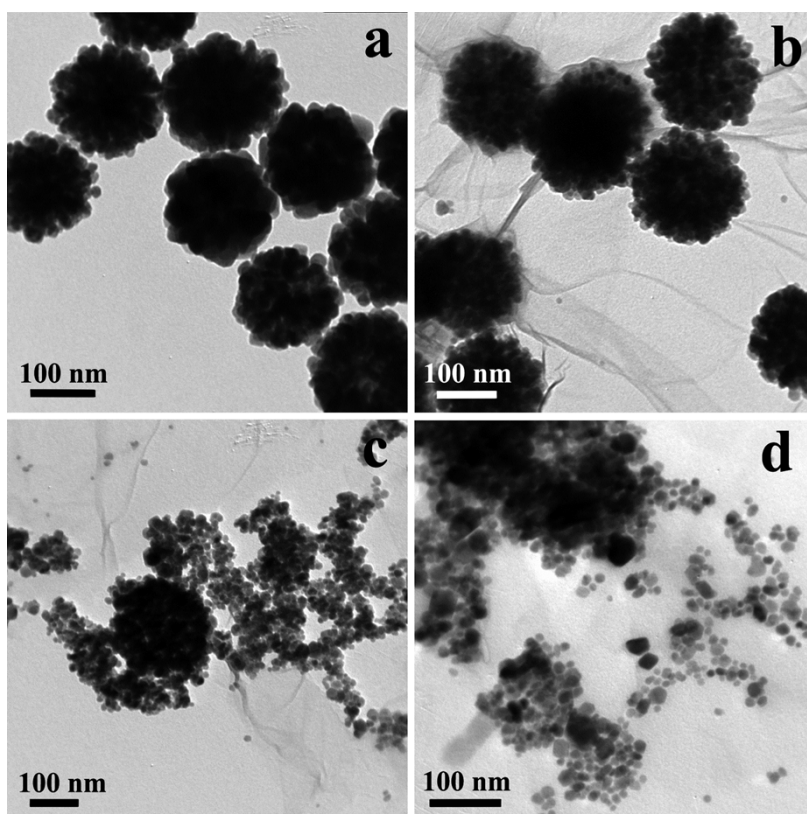

**Fig. S3.** The TEM images of Fe<sub>3</sub>O<sub>4</sub>/G with different volume of GO: a) 4 mL; b) 6 mL; c) 8 mL; d) 10 mL.

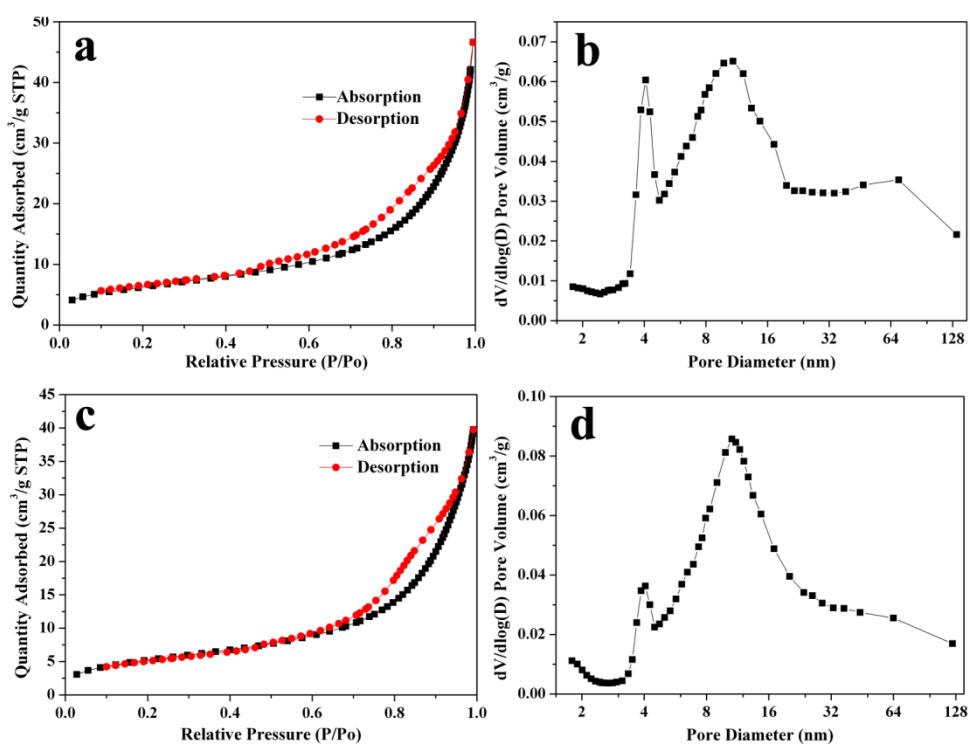

**Fig. S4.** N<sub>2</sub> adsorption/desorption isotherms and pore size distribution of (a, b) Fe<sub>3</sub>O<sub>4</sub>-

G mixed and (c, d) bare  $\text{Fe}_3\text{O}_4$ .

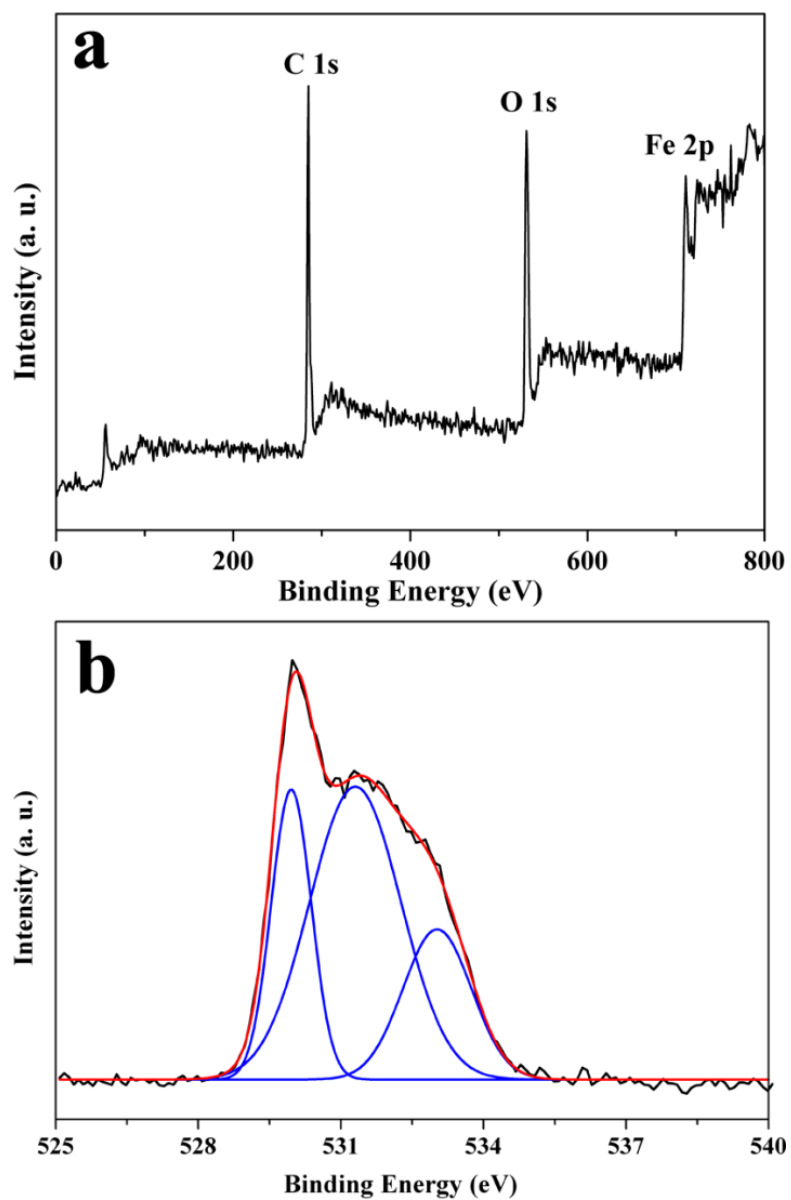

**Fig. S5.** The full spectrum (a) and core-level O1s (b) XPS spectra of  $\text{Fe}_3\text{O}_4/\text{G}$  hybrid framework.

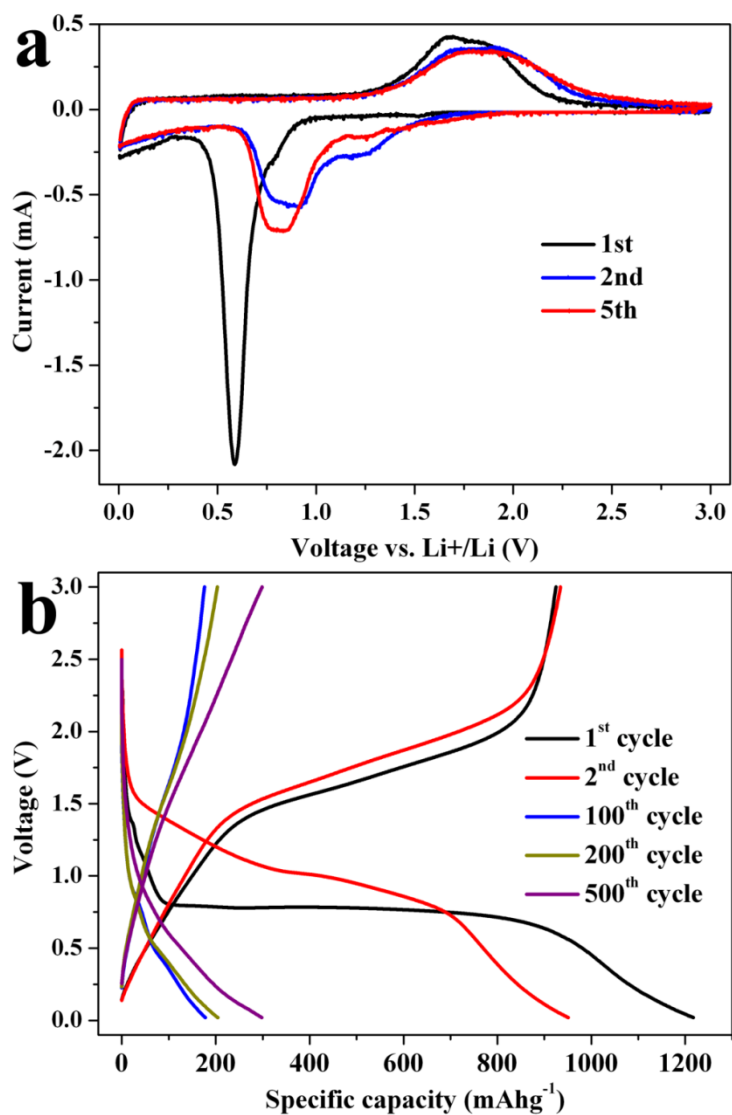

**Fig. S6.** (a) Cyclic voltammogram curves of bare Fe<sub>3</sub>O<sub>4</sub> at a scan rate of 0.1 mVs<sup>-1</sup>; (b) Charge and discharge profiles of the bare Fe<sub>3</sub>O<sub>4</sub> electrode at a current density of 500 mAg<sup>-1</sup>.
